# Supplementary material for: Mechanism of Action for Obtaining Job Offers With Virtual Reality Job Interview Training
Source: Atypon-hosted journal article supplement (doi:10.1176/appi.ps.201600217), 2017-03-15
Supplement: appi.ps.201600217.ds001.pdf [file appi.ps.201600217.ds001.pdf]

## Supplemental Methods

We conducted a logistic regression with job offer as the dependent variable to evaluate whether VR-JIT trainees across all four cohorts of participants had greater odds of receiving a job offer. We included neurocognition and the number of months since prior employment (both are a priori variables identified in the literature), as well as VR-JIT group status. We generated odds ratios (OR) and 95% confidence intervals (CI) as well as the Nagelkerke  $R^2$  to determine the proportion of explained variance.

## Supplemental Results

The model explained a total of 15% of the variance in receiving a job offer. Overall, the model had 70% accuracy at predicting cases receiving a job offer, and the omnibus test of model coefficients was significant ( $X^2=11.45$ ,  $df=3$ ,  $p<.01$ ). Moreover, the odds of receiving a job offer were higher for VR-JIT trainees across all four cohorts compared to the controls from across all four cohorts (OR=2.68, 95% CI=1.14-6.29;  $p=.03$ ). Meanwhile, participants had 1% reduced odds of receiving a job offer for each month since prior employment (OR=.99, 95% CI=.98-.99;  $p=.01$ ). Neurocognition was not a significant covariate (OR=1.01, 95% CI=.99-1.03;  $p=.14$ ).

## Supplemental References

1. Sheehan DV, Lecrubier Y, Sheehan KH, et al. The Mini-International Neuropsychiatric Interview (M.I.N.I.): the development and validation of a structured diagnostic psychiatric interview for DSM-IV and ICD-10. *Journal of Clinical Psychiatry* 59 Suppl 20:22-33;quiz 34-57, 1998.
2. First MB, Spitzer RL, Miriam G, et al. Structured clinical interview for DSM-IV-TR Axis I Disorders, Research Version, Non-patient Edition. New York, NY: Biometrics Research, New York State Psychiatric Institute; 2002.
3. Constantino JN, Gruber CP. Social Responsiveness Scale, Second Edition (SRS-2). Second Ed. Los Angeles, CA: Western Psychological Services; 2012.
4. Wilkinson GS, Robertson GJ. Wide Range Achievement Test 4 Professional Manual. Lutz, FL: Psychological Assessment Resources; 2006.
5. Randolph C, Tierney MC, Mohr E, et al. The Repeatable Battery for the Assessment of Neuropsychological Status (RBANS): preliminary clinical validity. *Journal of Clinical and Experimental Neuropsychology* 20(3):310-319, 1998.
6. Muthen LK, Muthen BO. Mplus user's guide (Version 7.2). Los Angeles, CA: Muthen, L. K. Muthen, B. O.; 2014.
7. Muthen BO. Bayesian analysis in Mplus: A brief introduction. Technical Report.2010: Available from: <http://www.statmodel.com/>.
8. Sobel, M. E. (1982). Asymptotic intervals for indirect effects in structural equations models. In S. Leinhardt (Ed.), *Sociological methodology* 1982 (pp.290-312). San Francisco: Jossey-Bass.
