# Supplementary material for: Mechanism of Action for Obtaining Job Offers With Virtual Reality Job Interview Training
Source: Atypon-hosted journal article supplement (doi:10.1176/appi.ps.201600217), 2017-03-15
Supplement: appi.ps.201600217.ds001.pdf [file appi.ps.201600217.ds001.pdf]

 


Psychiatry Online
